# Supplementary material for: Linear extension of bithiophene compounds by the combination of C–N covalent bond cross-coupling and N–Ag coordinative bond formation
Source: Royal Society of Chemistry journal article supplement (doi:10.1039/c0ce00689k), 2010-12-04
Supplement: c0ce00689k.pdf [file c0ce00689k.pdf]

## Linear extension of bithiophene compounds by the combination of C–N covalent bond cross-coupling and N–Ag coordinative bond formation

Li Wang, Tao Tao, Shu-Jun Fu, Cheng Wang, Wei Huang, Xiao-Zeng You

### Electronic Supporting Information

**Table 1** Selected bond distances (Å) and bond angles (°) in ligand L and three silver(I) complexes **1-3**.

| L                                    |           |                         |           |                        |           |
|--------------------------------------|-----------|-------------------------|-----------|------------------------|-----------|
| C1–N1                                | 1.406(8)  | C4–S1                   | 1.739(6)  | C6–N2                  | 1.359(9)  |
| C1–S1                                | 1.733(6)  | C5–N2                   | 1.300(9)  | C7–N1                  | 1.375(8)  |
| C4–C4 <sup>a</sup>                   | 1.450(11) | C5–N1                   | 1.354(8)  |                        |           |
| C5–N1–C7                             | 105.6(5)  | C7–N1–C1                | 128.1(5)  | C1–S1–C4               | 90.6(3)   |
| C5–N1–C1                             | 126.3(5)  | C5–N2–C6                | 104.9(6)  |                        |           |
| <sup>a</sup> -x, 1-y, 1-z.           |           |                         |           |                        |           |
| <b>1</b>                             |           |                         |           |                        |           |
| Ag1–N2 <sup>a</sup>                  | 2.172(5)  | C1–N1                   | 1.412(8)  | C5–N1                  | 1.380(9)  |
| Ag1–N2                               | 2.172(5)  | C1–S1                   | 1.717(6)  | C6–N2                  | 1.376(9)  |
| Ag1–O1 <sup>a</sup>                  | 2.745(8)  | C4–S1                   | 1.730(7)  | C7–N1                  | 1.377(8)  |
| Ag1–O1                               | 2.745(8)  | O1 <sup>a</sup> –Ag1–O1 | 46.0(3)   |                        |           |
| N2 <sup>a</sup> –Ag1–N2              | 152.1(3)  | C5–N2                   | 1.303(8)  | O2–N3–O1 <sup>a</sup>  | 119.0(6)  |
| N2 <sup>a</sup> –Ag1–O1 <sup>a</sup> | 81.4(2)   | C7–N1–C5                | 106.9(6)  | O2–N3–O1               | 119.0(6)  |
| N2–Ag1–O1 <sup>a</sup>               | 126.4(2)  | C7–N1–C1                | 127.2(6)  | O1 <sup>a</sup> –N3–O1 | 122.0(11) |
| N2 <sup>a</sup> –Ag1–O1              | 126.4(2)  | C5–N1–C1                | 125.8(6)  | C1–S1–C4               | 90.9(3)   |
| N2–Ag1–O1                            | 81.4(2)   | C5–N2–C6                | 106.4(6)  |                        |           |
| <sup>a</sup> 3-x, y, 0.5-z.          |           |                         |           |                        |           |
| <b>2</b>                             |           |                         |           |                        |           |
| Ag1–N4                               | 2.140(6)  | C8–N3                   | 1.405(9)  | C6–N2                  | 1.374(10) |
| Ag1–N2                               | 2.134(6)  | C8–S2                   | 1.727(7)  | C7–N1                  | 1.376(9)  |
| Ag1–O2 <sup>a</sup>                  | 2.843(6)  | C11–C11 <sup>b</sup>    | 1.425(14) | C1–N1                  | 1.404(9)  |
| C12–N4                               | 1.317(9)  | C11–S2                  | 1.739(7)  | C1–S1                  | 1.730(7)  |
| C12–N3                               | 1.335(9)  | C5–N2                   | 1.319(9)  | C4–C4 <sup>c</sup>     | 1.464(14) |
| C13–N4                               | 1.357(10) | C5–N1                   | 1.329(9)  | C4–S1                  | 1.736(6)  |
| C14–N3                               | 1.389(9)  | C5–N2–C6                | 105.4(6)  | C5–N1–C1               | 125.2(6)  |
| C12–N4–Ag1                           | 120.7(5)  | N4–Ag1–N2               | 159.1(2)  | C7–N1–C1               | 127.5(6)  |
| C13–N4–Ag1                           | 132.6(5)  | C12–N3–C14              | 106.5(6)  | C1–S1–C4               | 90.2(4)   |

|                                                                                                                  |           |            |          |                                       |           |
|------------------------------------------------------------------------------------------------------------------|-----------|------------|----------|---------------------------------------|-----------|
| C12–N3–C8                                                                                                        | 124.9(6)  | C12–N4–C13 | 106.1(6) | C8–S2–C11                             | 90.9(4)   |
| C14–N3–C8                                                                                                        | 128.4(6)  | C5–N1–C7   | 107.1(6) |                                       |           |
| <sup>a</sup> 1+x, 1+y, z; <sup>b</sup> 1-x, 1-y, -z; <sup>c</sup> 3-x, 1-y, 1-z.                                 |           |            |          |                                       |           |
| <b>3</b>                                                                                                         |           |            |          |                                       |           |
| Ag1–N4 <sup>a</sup>                                                                                              | 2.126(5)  | C10–N2     | 1.349(8) | C12–N4                                | 1.316(6)  |
| Ag1–N2                                                                                                           | 2.126(4)  | C1–N1      | 1.416(6) | C12–N3                                | 1.352(6)  |
| Ag1–O2 <sup>b</sup>                                                                                              | 2.738(9)  | C1–S1      | 1.721(5) | C13–N4                                | 1.364(8)  |
| Ag1–Ag1 <sup>c</sup>                                                                                             | 3.0084(9) | C4–S1      | 1.726(4) | C14–N3                                | 1.365(7)  |
| C9–N2                                                                                                            | 1.310(6)  | C5–S2      | 1.723(5) | C15–O2                                | 1.156(11) |
| C9–N1                                                                                                            | 1.336(6)  | C8–N3      | 1.418(6) | C15–O1                                | 1.191(9)  |
| C11–N1                                                                                                           | 1.358(7)  | C8–S2      | 1.711(5) | C14–N3–C8                             | 127.4(4)  |
| N4 <sup>a</sup> –Ag1–N2                                                                                          | 169.0(2)  | C9–N1–C11  | 106.2(5) | C12–N4–C13                            | 106.1(5)  |
| N4 <sup>a</sup> –Ag1–O2 <sup>b</sup>                                                                             | 91.3(3)   | C9–N1–C1   | 126.1(4) | C1–S1–C4                              | 91.4(2)   |
| N2–Ag1–O2 <sup>b</sup>                                                                                           | 93.4(3)   | C11–N1–C1  | 127.6(5) | C8–S2–C5                              | 91.1(2)   |
| N4 <sup>a</sup> –Ag1–Ag1 <sup>c</sup>                                                                            | 96.4(1)   | C12–N3–C14 | 106.8(4) | O2 <sup>b</sup> –Ag1–Ag1 <sup>c</sup> | 88.8(3)   |
| N2–Ag1–Ag1 <sup>c</sup>                                                                                          | 93.7(1)   | C12–N3–C8  | 125.8(4) | C9–N2–C10                             | 105.2(5)  |
| <sup>a</sup> 1+x, 1+y, -1+z; <sup>b</sup> 2-x, 1-y, -z; <sup>c</sup> 3-x, 1-y, -z; <sup>d</sup> -1+x, -1+y, 1+z. |           |            |          |                                       |           |

**Table 2.** Hydrogen-bonding parameters (Å, °) in ligand L and three silver(I) complexes **1-3**

| D–H...A      | D–H  | H...A | D...A     | ∠DHA | Sym. Trans.          |
|--------------|------|-------|-----------|------|----------------------|
| <b>L</b>     |      |       |           |      |                      |
| C2–H2...N2   | 0.93 | 2.52  | 3.446(8)  | 175  | -x, 1/2+y, 1/2-z     |
| <b>1</b>     |      |       |           |      |                      |
| C2–H2...O1   | 0.93 | 2.42  | 3.247(10) | 148  | -1+x, -1+y, z        |
| C5–H5...O2   | 0.93 | 2.33  | 3.163(9)  | 149  | x, -1+y, z           |
| C6–H6...O1   | 0.93 | 2.44  | 3.067(10) | 125  |                      |
| <b>2</b>     |      |       |           |      |                      |
| C5–H5...O3   | 0.93 | 2.58  | 3.438(16) | 153  | 1+x, y, z            |
| C10–H10...O4 | 0.93 | 2.56  | 3.430(11) | 155  | 1/2-x, -1/2+y, 1/2-z |
| C12–H12...O4 | 0.93 | 2.44  | 3.220(11) | 142  | 1+x, y, z            |
| C13–H13...O1 | 0.93 | 2.51  | 3.232(12) | 134  | 1+x, 1+y, z          |
| <b>3</b>     |      |       |           |      |                      |
| C2–H2...O1   | 0.93 | 2.54  | 3.427(10) | 160  | 1+x, -1+y, z         |
| C13–H13...O1 | 0.93 | 2.58  | 3.337(10) | 138  | x, -1+y, 1+z         |

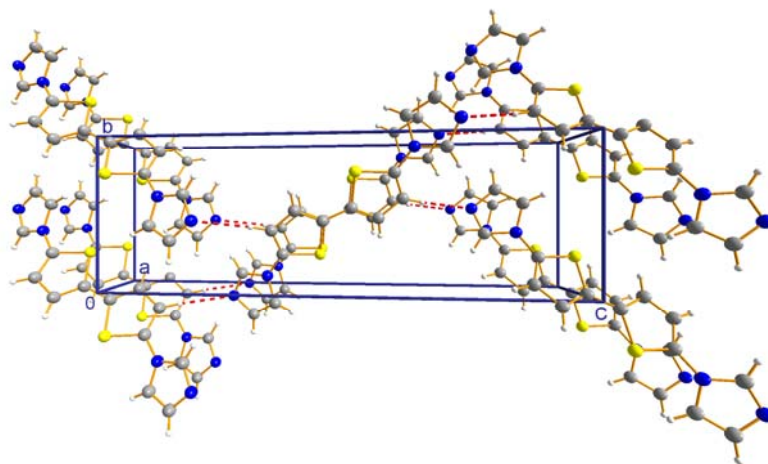

**Fig. S11.** View of the hydrogen bonding and  $\pi$ - $\pi$  stacking interactions in L.

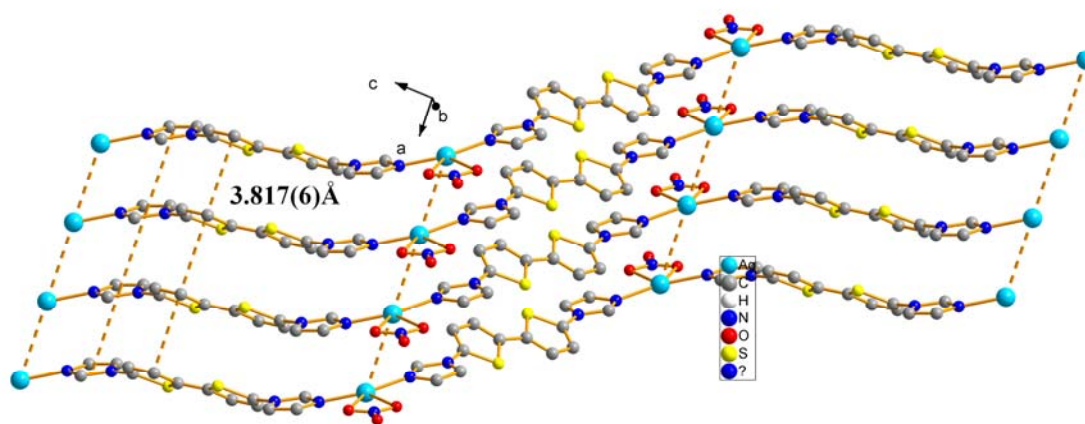

**Fig. S12.** View of the undulating chains in  $[\text{Ag}(\text{L})\text{NO}_3]_n$  (**1**).

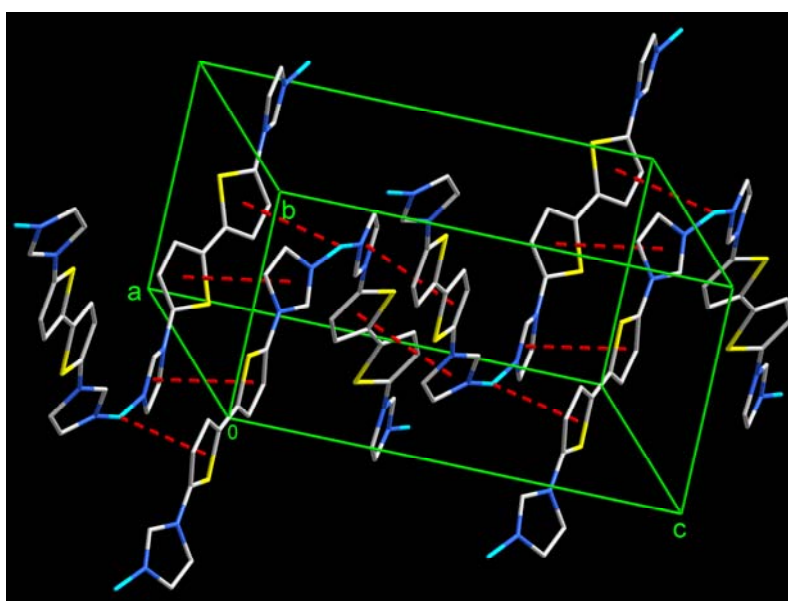

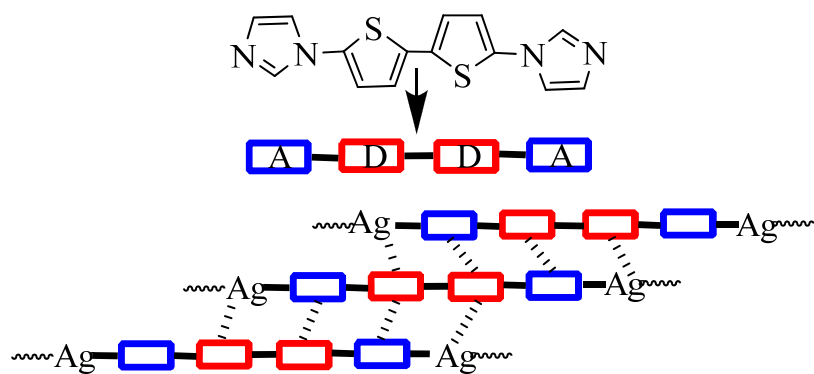

**Fig. S13.** View of the  $\pi$ - $\pi$  stacking and Ag- $\pi$  interactions in complex **2**

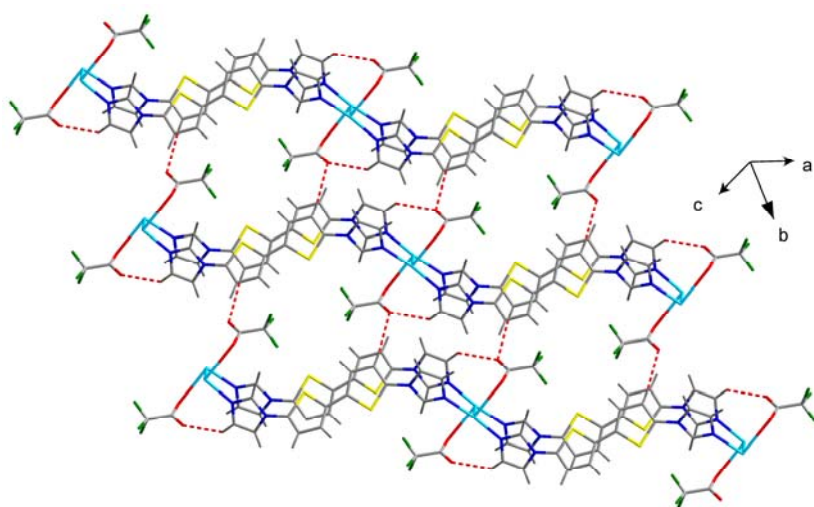

**Fig. S14.** View of the  $\pi$ - $\pi$  stacking and hydrogen bonding interactions in  $[\text{Ag}(\text{L})(\text{CF}_3\text{COO})]_n$  (**3**)

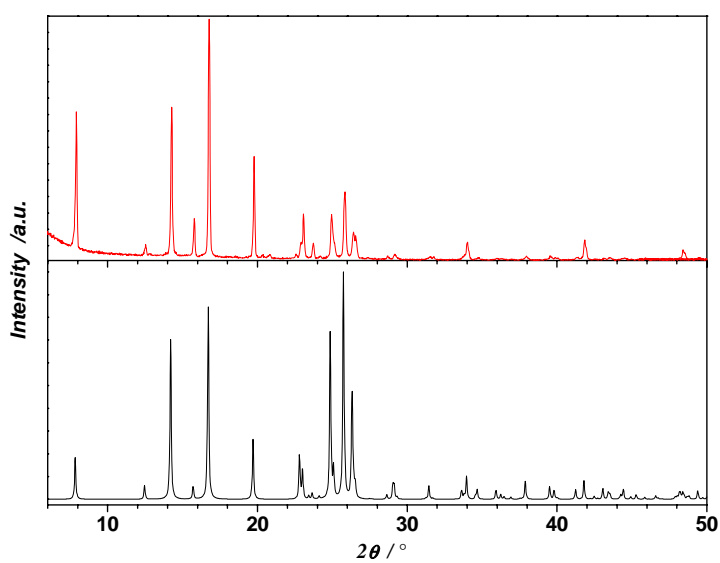

**Fig. S15.** The simulative (black line) and experimental (red line) powder X-ray

diffraction patterns for **L**.

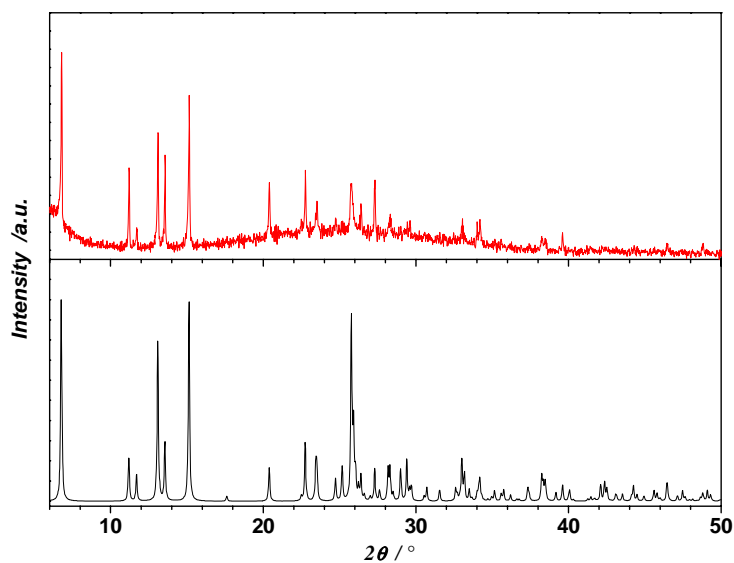

**Fig. SI6.** The simulative (black line) and experimental (red line) powder X-ray diffraction patterns for **1**.

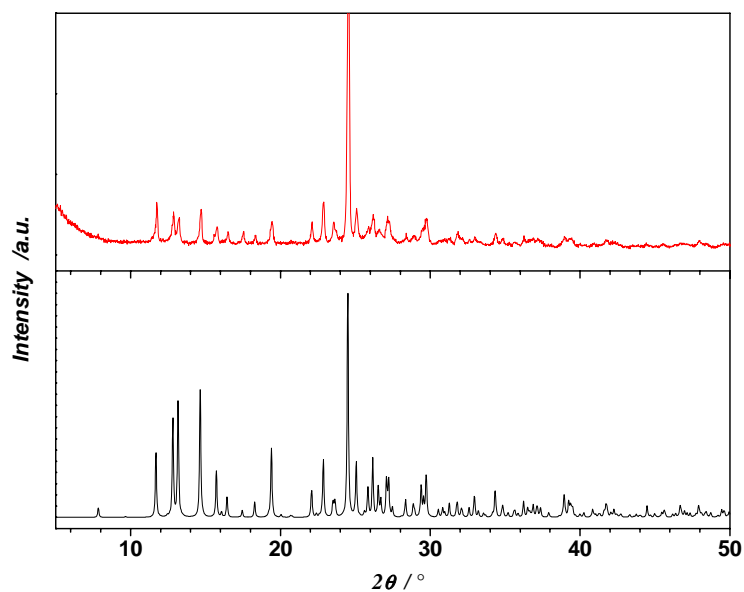

**Fig. SI7.** The simulative (black line) and experimental (red line) powder X-ray diffraction patterns for **2**.

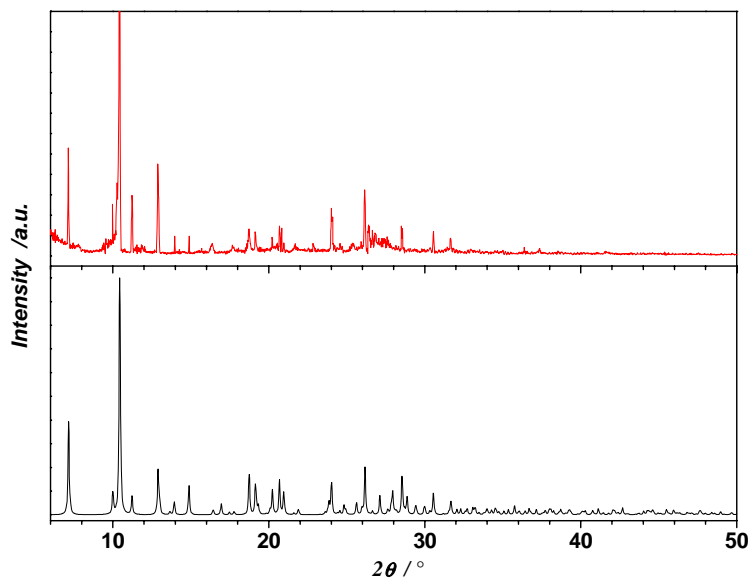

**Fig. S18.** The simulative (black line) and experimental (red line) powder X-ray diffraction patterns for **3**.

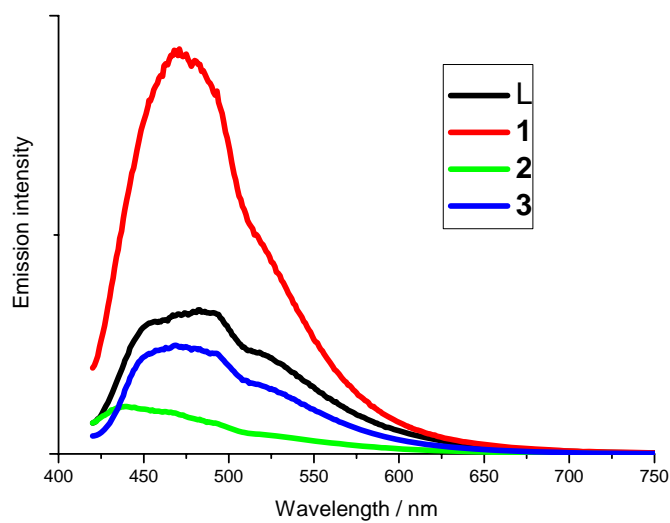

**Fig. S19.** Solid-state fluorescence emission spectra of L, **1**, **2** and **3** at room temperature.
